# Supplementary material
Source: PubMed Central journal article supplement (PMC3477230)
Supplement: supp_mol.112.079707_EGCG_Mol_Pharm_Resubmission_2012_FinalAcceptReviSupplemental_Data.pdf [file supp_mol.112.079707_EGCG_Mol_Pharm_Resubmission_2012_FinalAcceptReviSupplemental_Data.pdf]

**Coordinated regulation of murine cardiomyocyte contractility by nanomolar (-)-epigallocatechin-3-gallate, the major green tea catechin**

Wei Feng, Hyun Seok Hwang, Dmytro O. Kryshal, Tao Yang, Isela T. Padilla, Asheesh K.

Tiwary, Birgit Puschner, Isaac N. Pessah and Björn C. Knollmann

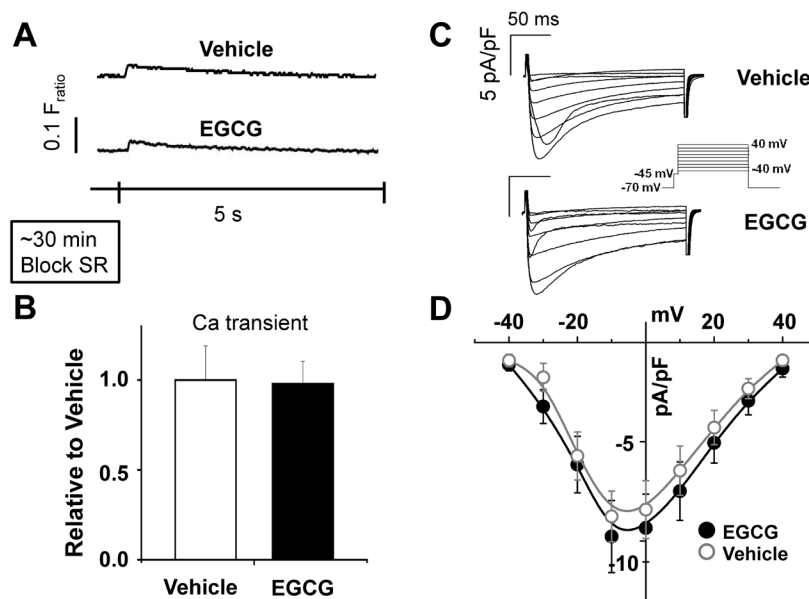

Supplemental Figure 1. Effect of EGCG on  $Ca^{2+}$  influx in myocytes. A. Example traces and protocol of  $Ca^{2+}$  fluorescence recording from field-stimulated (0.2Hz) myocytes after 5 min exposure either EGCG (10nM) or vehicle.  $Ca^{2+}$  concentration of external solution changed from 2mM to 5mM for 8 second. B. Comparison of average  $Ca^{2+}$  transient. N= 11-12 myocytes per group. C. Typical  $Ba^{2+}$  currents in the absence and presence of EGCG, 10nM. Voltage clamp protocol shown in inset. D. Summary of the current-voltage (I-V) relations in the two groups of myocytes n=6-7 per group.
